# Supplementary material for: Carbapenem Resistant Aeromonas hydrophila Carrying blacphA7 Isolated From Two Solid Organ Transplant Patients
Source: Front Cell Infect Microbiol. 2020 Oct 26;10:563482. doi: 10.3389/fcimb.2020.563482 (PMC7649429; doi:10.3389/fcimb.2020.563482)
Supplement: Supplementary file 1 [file Data_Sheet_1.xlsx]

## Sheet: Sheet1
Position	Chromosome	Subtree with	Subtree with A-1	Gene	Amino Acid Change
		B-1 and B-2
16613	NZ_CP018201	G (2)	T (1)	GAP	None
34240	NZ_CP018201	C (2)	A (1)	Beta-lactam response regulator trasnporter BlrA	Negative-Asp17Tyr
165985	NZ_CP018201	C (2)	T (1)	Response regulator	Neutral-Thr14Ala
189411	NZ_CP018201	Gap (2)	C (1)	Bile-acid:sodium symporter	None
701339	NZ_CP018201	C (2)	T (1)	hypothetical protein	None
774775	NZ_CP018201	T (2)	A (1)	GAP	None
933410	NZ_CP018201	C (2)	A (1)	Phosphoribosylaminoimidazolesuccinocarboxamide synthase	Negative-Pro58Gln
1260191	NZ_CP018201	A (2)	C (1)	NAD-dependent DNA ligase LigA	Neutral-Leu242Ile
1606831	NZ_CP018201	Gap (2)	A (1)	GAP	None
1606851	NZ_CP018201	Gap (2)	T (1)	GAP	None
1606877	NZ_CP018201	Gap (2)	A (1)	GAP	None
1663379	NZ_CP018201	T (2)	C (1)	hypothetical protein	None
1896111	NZ_CP018201	C (2)	T (1)	lipopolysaccharide assembly protein	Neutral-Ala333Val
2082051	NZ_CP018201	C (2)	T (1)	insulinase family protein	Negative-Pro19Leu
2179559	NZ_CP018201	C (2)	T (1)	ATP-binding cassette domain containing protein	Negative-Thr423Ile
2395030	NZ_CP018201	A (2)	C (1)	recombinase family protein	Favored-Arg125Gln
2395045	NZ_CP018201	G (2)	C (1)	recombinase family protein	None
2395565	NZ_CP018201	A (2)	C (1)	GAP	None
2537709	NZ_CP018201	T (2)	C (1)	AEC family transporter	None
2631161	NZ_CP018201	G (2)	A (1)	acyl-CDA dehydrogenase	Neutral-Ala258Val
2752452	NZ_CP018201	C (2)	G (1)	GAF domain containing protein	Neutral-Ala580Gly
3086006	NZ_CP018201	G (2)	A (1)	MtrB/PioB family decaheme-associated outermembrane protein	None
3650844	NZ_CP018201	A (1), T (1)	T (1)	RodA	Neutral-Ser251Thr
3689076	NZ_CP018201	C (2)	T (1)	two-component system response regulator BtsR	None
3957978	NZ_CP018201	G (2)	A (1)	hypothetical protein	None
3961017	NZ_CP018201	G (2)	T (1)	DUF2787 domain-containing protein	Neutral-Leu121Met
3961042	NZ_CP018201	G (2)	T (1)	DUF2787 domain-containing protein	Val113Ala
3961077	NZ_CP018201	T (2)	C (1)	DUF2787 domain-containing protein	None
3961131	NZ_CP018201	G (2)	T (1)	DUF2787 domain-containing protein	None
3961143	NZ_CP018201	G (2)	A (1)	DUF2787 domain-containing protein	None
3961157	NZ_CP018201	C (2)	T (1)	DUF2787 domain-containing protein	Neutral-Ile75Val
3961167	NZ_CP018201	C (2)	G (1)	DUF2787 domain-containing protein	Neutral-Val71Leu
3961212	NZ_CP018201	C (2)	G (1)	DUF2787 domain-containing protein	None
3961227	NZ_CP018201	G (2)	A (1)	DUF2787 domain-containing protein	None
4262250	NZ_CP018201	G (2)	A (1)	diguanylate cyclase	None
4301840	NZ_CP018201	A (2)	Gap (1)	GAP	None
