# Supplementary material for: Carbapenem Resistant Aeromonas hydrophila Carrying blacphA7 Isolated From Two Solid Organ Transplant Patients
Source: Front Cell Infect Microbiol. 2020 Oct 26;10:563482. doi: 10.3389/fcimb.2020.563482 (PMC7649429; doi:10.3389/fcimb.2020.563482)
Supplement: Supplementary file 2 [file Data_Sheet_2.xlsx]

## Sheet: B-1 Plasmid 1 Annotation
Name	Type	Minimum	Maximum	Length	Direction
Abort lactococcal phage infection AbiTii gene	gene	68841	69743	903	forward
Abort lactococcal phage infection AbiTii gene	gene	64920	65816	897	forward
Abort lactococcal phage infection AbiTii gene	gene	72330	73226	897	forward
Abort lactococcal phage infection AbiTii gene	gene	75034	75924	891	forward
Abort lactococcal phage infection AbiTii gene	gene	63427	63729	303	forward
Adenine-specific methyltransferase (EC 2.1.1.72) gene	gene	92488	93132	645	forward
Aerotaxis sensor receptor protein gene	gene	22661	23536	876	reverse
Aminoglycoside 3'-phosphotransferase (EC 2.7.1.95) gene	gene	33460	34275	816	reverse
Beta-lactamase (EC 3.5.2.6) gene	gene	39677	40543	867	reverse
Chromate transport protein ChrA gene	gene	48593	49798	1206	reverse
Chromosome (plasmid) partitioning protein ParB gene	gene	89718	91163	1446	forward
conserved hypothetical protein gene	gene	76064	76423	360	forward
D-beta-hydroxybutyrate dehydrogenase (EC 1.1.1.30) gene	gene	37732	38634	903	reverse
DeoR family transcriptional regulator probably related to glycerate, glycolaldehyde metabolism gene	gene	38895	39656	762	forward
Dihydrofolate reductase (EC 1.5.1.3) gene	gene	54155	54652	498	reverse
Dihydropteroate synthase type-2 (EC 2.5.1.15) @ Sulfonamide resistance protein gene	gene	51612	52451	840	reverse
DNA-binding protein H-NS gene	gene	81073	81480	408	reverse
Error-prone repair protein UmuD gene	gene	71117	71539	423	reverse
Error-prone, lesion bypass DNA polymerase V (UmuC) gene	gene	69840	71120	1281	reverse
Ethidium bromide-methyl viologen resistance protein EmrE gene	gene	52445	52792	348	reverse
FIG00732096: hypothetical protein gene	gene	40835	41095	261	forward
FIG00905474: hypothetical protein gene	gene	19339	20253	915	forward
gene	gene	96073	98256	2184	forward
gene	gene	109991	111388	1398	reverse
gene	gene	10431	11552	1122	forward
gene	gene	67706	68632	927	forward
gene	gene	115513	116439	927	reverse
gene	gene	44069	44974	906	forward
gene	gene	63804	64691	888	reverse
gene	gene	79947	80819	873	reverse
gene	gene	3434	4300	867	reverse
gene	gene	111779	112645	867	reverse
gene	gene	5914	6702	789	reverse
gene	gene	15161	15937	777	forward
gene	gene	119571	120302	732	forward
gene	gene	9691	10416	726	forward
gene	gene	84436	85092	657	reverse
gene	gene	21890	22513	624	forward
gene	gene	117457	118044	588	reverse
gene	gene	46209	46793	585	forward
gene	gene	6699	7256	558	reverse
gene	gene	93836	94387	552	forward
gene	gene	8079	8621	543	reverse
gene	gene	13862	14374	513	forward
gene	gene	11585	12085	501	forward
gene	gene	95589	96083	495	forward
gene	gene	91255	91737	483	reverse
gene	gene	118025	118504	480	reverse
gene	gene	86182	86643	462	forward
gene	gene	120707	121165	459	forward
gene	gene	82653	83087	435	reverse
gene	gene	118501	118932	432	reverse
gene	gene	87529	87954	426	forward
gene	gene	78128	78538	411	reverse
gene	gene	104961	105362	402	forward
gene	gene	77702	78097	396	reverse
gene	gene	86677	87060	384	forward
gene	gene	21396	21749	354	forward
gene	gene	18961	19296	336	reverse
gene	gene	21049	21381	333	forward
gene	gene	7264	7557	294	reverse
gene	gene	67241	67525	285	forward
gene	gene	20240	20512	273	forward
gene	gene	88096	88365	270	forward
gene	gene	102959	103216	258	reverse
gene	gene	31	285	255	reverse
gene	gene	103739	103990	252	reverse
gene	gene	73327	73572	246	reverse
gene	gene	84179	84421	243	reverse
gene	gene	66736	66972	237	forward
gene	gene	92216	92449	234	reverse
gene	gene	93142	93372	231	forward
gene	gene	101978	102202	225	forward
gene	gene	103319	103543	225	forward
gene	gene	85348	85569	222	forward
gene	gene	119021	119239	219	forward
gene	gene	77358	77567	210	forward
gene	gene	79010	79216	207	forward
gene	gene	14477	14680	204	forward
gene	gene	104650	104853	204	forward
gene	gene	94979	95176	198	reverse
gene	gene	14849	15037	189	reverse
gene	gene	46907	47095	189	forward
gene	gene	77122	77307	186	reverse
gene	gene	101763	101945	183	forward
gene	gene	64724	64900	177	reverse
gene	gene	91868	92038	171	forward
gene	gene	120513	120683	171	forward
gene	gene	76883	77041	159	reverse
gene	gene	15943	16098	156	reverse
gene	gene	68711	68860	150	forward
gene	gene	85681	85830	150	forward
gene	gene	38672	38812	141	reverse
gene	gene	35136	35273	138	forward
gene	gene	74865	75002	138	forward
gene	gene	119402	119533	132	reverse
gene	gene	120290	120421	132	forward
gene	gene	13664	13792	129	reverse
gene	gene	53781	53906	126	forward
gene	gene	23693	23815	123	forward
gene	gene	51049	51171	123	reverse
gene	gene	61120	61242	123	reverse
gene	gene	87986	88099	114	forward
gene	gene	27707	27805	99	forward
gene	gene	30499	30597	99	reverse
gene	gene	122772	122870	99	reverse
hypothetical protein gene	gene	105396	109982	4587	reverse
hypothetical protein gene	gene	98260	101709	3450	forward
hypothetical protein gene	gene	4312	5904	1593	reverse
hypothetical protein gene	gene	12098	13459	1362	forward
hypothetical protein gene	gene	73553	74842	1290	reverse
hypothetical protein gene	gene	88425	89624	1200	forward
hypothetical protein gene	gene	114329	115513	1185	reverse
hypothetical protein gene	gene	121205	122188	984	forward
hypothetical protein gene	gene	17093	17989	897	reverse
hypothetical protein gene	gene	83248	84114	867	forward
hypothetical protein gene	gene	8841	9563	723	reverse
hypothetical protein gene	gene	66107	66739	633	forward
hypothetical protein gene	gene	104089	104637	549	forward
hypothetical protein gene	gene	102258	102719	462	forward
hypothetical protein gene	gene	94516	94965	450	forward
hypothetical protein gene	gene	79504	79935	432	reverse
hypothetical protein gene	gene	111385	111777	393	reverse
hypothetical protein gene	gene	16386	16775	390	reverse
hypothetical protein gene	gene	3043	3414	372	reverse
hypothetical protein gene	gene	7615	7974	360	reverse
hypothetical protein gene	gene	20705	21052	348	forward
hypothetical protein gene	gene	71823	72155	333	forward
hypothetical protein gene	gene	95244	95561	318	forward
hypothetical protein gene	gene	85851	86144	294	forward
hypothetical protein gene	gene	78588	78875	288	reverse
hypothetical protein gene	gene	48138	48251	114	forward
IncF plasmid conjugative transfer pilus assemblyprotein TraC gene	gene	381	3029	2649	reverse
IncF plasmid conjugative transfer pilus assemblyprotein TraU gene	gene	116450	117460	1011	reverse
IncF plasmid conjugative transfer protein TraN gene	gene	112729	114327	1599	reverse
IncF plasmid conjugative transfer surface exclusion protein TraT gene	gene	81900	82637	738	reverse
Integron integrase IntI1 gene	gene	54797	55810	1014	forward
Lactose permease gene	gene	42301	43179	879	reverse
Mercuric ion reductase (EC 1.16.1.1) gene	gene	28231	29529	1299	forward
Mercuric ion reductase (EC 1.16.1.1) gene	gene	26572	27027	456	forward
Mercuric resistance operon coregulator gene	gene	29547	29909	363	forward
Mercuric resistance operon regulatory protein gene	gene	24917	25351	435	reverse
Mercuric transport protein, MerC gene	gene	26059	26520	462	forward
Mercuric transport protein, MerE gene	gene	29906	30034	129	forward
Mercuric transport protein, MerT gene	gene	25423	25773	351	forward
Mobile element protein gene	gene	57052	60018	2967	forward
Mobile element protein gene	gene	23834	24838	1005	reverse
Mobile element protein gene	gene	50026	51030	1005	forward
Mobile element protein gene	gene	60097	61101	1005	forward
Mobile element protein gene	gene	32566	33270	705	forward
Mobile element protein gene	gene	34426	35130	705	forward
Mobile element protein gene	gene	43243	43947	705	forward
Mobile element protein gene	gene	27031	27657	627	reverse
Mobile element protein gene	gene	30647	31273	627	forward
Mobile element protein gene	gene	122920	123546	627	forward
Mobile element protein gene	gene	56489	57049	561	forward
Mobile element protein gene	gene	56013	56363	351	forward
Mobile element protein gene	gene	27897	28208	312	reverse
Mobile element protein gene	gene	30096	30407	312	forward
Mobile element protein gene	gene	122369	122680	312	forward
Periplasmic mercury(+2) binding protein gene	gene	25787	26062	276	forward
Predicted pyridoxine biosynthesis protein (probably from glycolaldehide) gene	gene	36455	37720	1266	reverse
putative RecF protein gene	gene	41125	42270	1146	forward
putative transcriptional regulator gene	gene	76423	76725	303	forward
repeat region	repeat	23564	24921	1358	forward
repeat region	repeat	49943	51300	1358	forward
repeat region	repeat	60014	61370	1357	forward
repeat region	repeat	27023	27942	920	forward
repeat region	repeat	30362	31281	920	forward
repeat region	repeat	122635	123554	920	forward
repeat region	repeat	28015	28283	269	forward
repeat region	repeat	122294	122562	269	forward
repeat region	repeat	30022	30289	268	forward
Resolvase gene	gene	18097	18852	756	reverse
Ribulose-5-phosphate 4-epimerase and related epimerases and aldolases gene	gene	35842	36462	621	reverse
similar to puromycin N-acetyltransferase gene	gene	51212	51484	273	reverse
Streptomycin 3''-O-adenylyltransferase (EC 2.7.7.47) @ Spectinomycin 9-O-adenylyltransferase gene	gene	52956	53735	780	reverse
Streptomycin 3''-O-adenylyltransferase (EC 2.7.7.47) @ Spectinomycin 9-O-adenylyltransferase gene	gene	54649	54765	117	reverse
TniA putative transposase gene	gene	31287	32519	1233	forward
Transcriptional regulator NanR gene	gene	44971	46209	1239	forward
Transcriptional regulator, PadR family gene	gene	48277	48582	306	reverse
transposase gene	gene	61388	63376	1989	forward
transposase gene	gene	47286	48080	795	reverse
